# Supplementary material for: Post-synthesis of Sn-beta zeolite by aerosol method
Source: Royal Society of Chemistry journal article supplement (doi:10.1039/d2ra06366b), 2023-01-01
Supplement: d2ra06366b1.pdf [file d2ra06366b1.pdf]

## Support material

### Post-Synthesis of Sn-Beta zeolite by Aerosol method

The synthesis of Sn-Beta-x-D: 0.10g  $\text{SnCl}_2 \cdot 2\text{H}_2\text{O}$  was dissolved in 38g deionized water, and 2g De-Al-Beta zeolite was added. After stirring for 5 hours, it was dried in an oven at 110 °C for 3 hours. Finally the powder is calcined at 550 °C for 6 hours to obtain Sn-Beta zeolite, which is denoted as Sn-Beta-x-D.

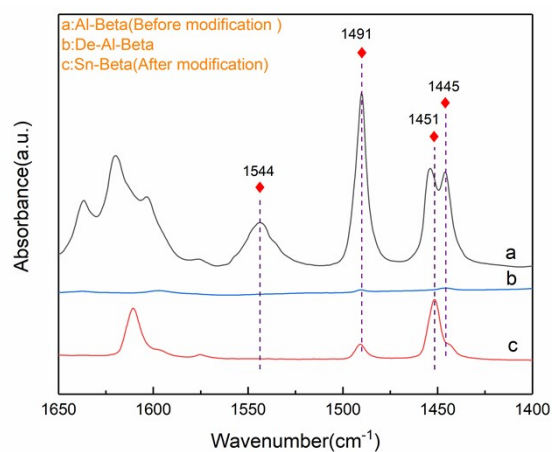

Fig. 1 FT-IR spectra of the Al-Beta, De-Al-Beta and Sn-Beta samples after pyridine adsorption at 298K for 30 min and desorption at 423K for 35 min

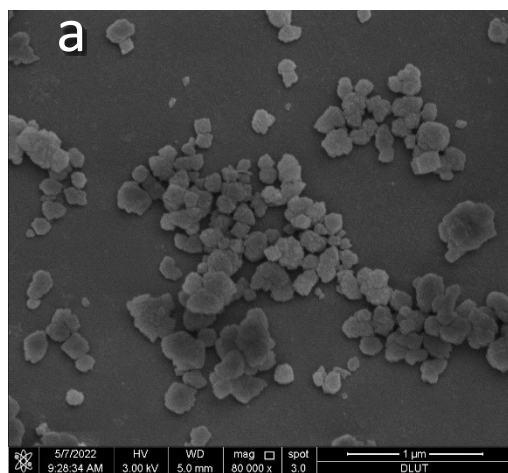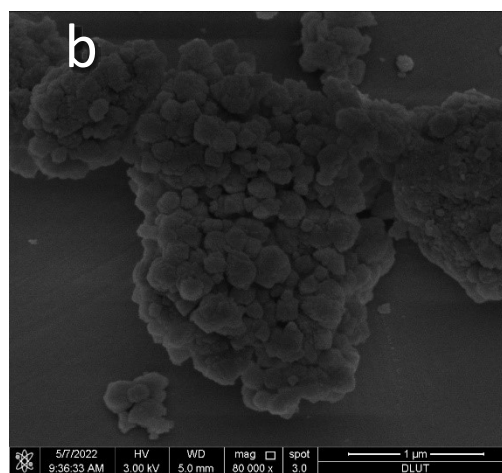

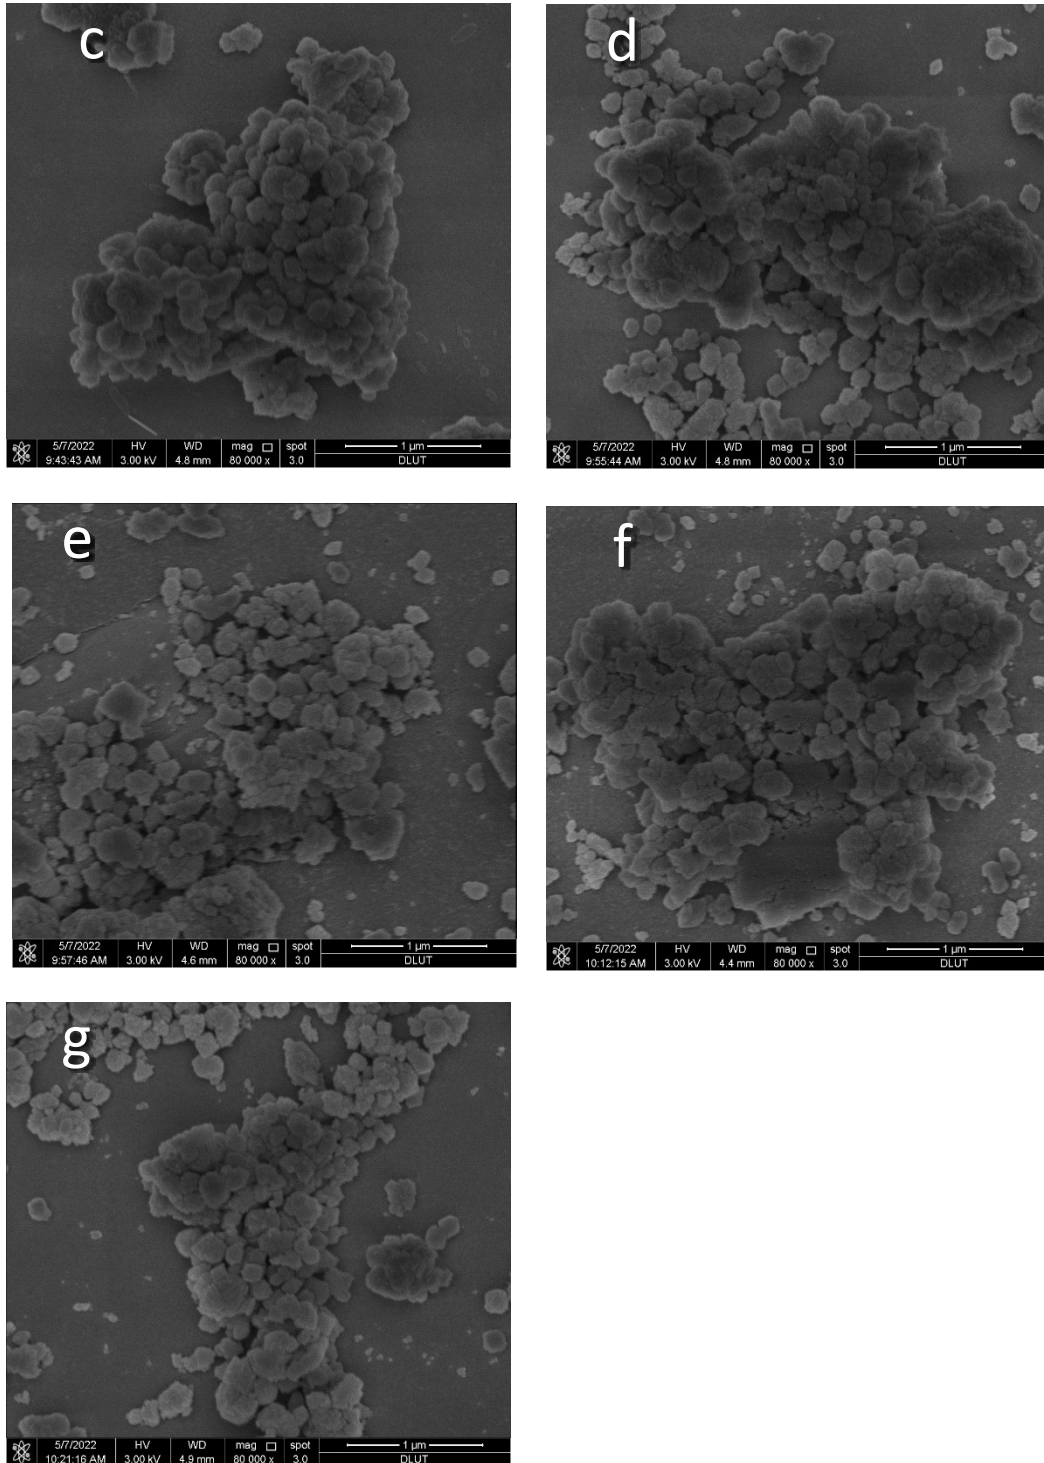

Fig. 2 SEM images of the De-Al-Beta (a), Sn-Beta-1 (b), Sn-Beta-2 (c), Sn-Beta-2.5(d) , Sn-Beta-3(e), Sn-Beta-4(f) and Sn-Beta-5(g) samples

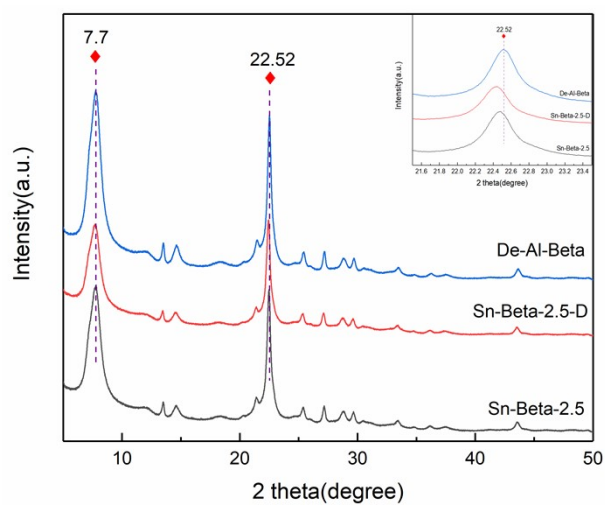

Fig. 3 XRD patterns of De-Al-Beta、Sn-Beta-2.5 and Sn-Beta-2.5-D

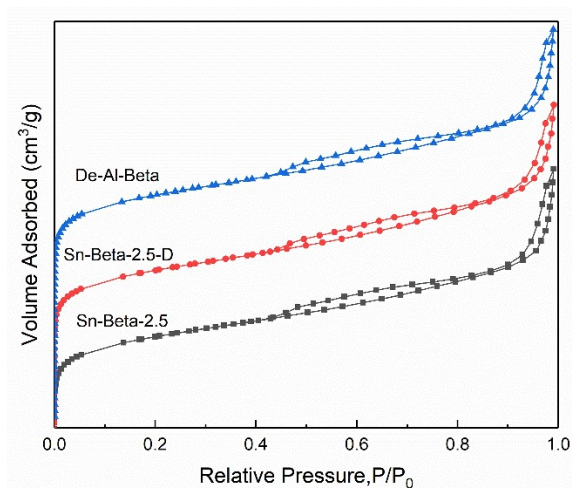

Fig. 4 Nitrogen adsorption-desorption isotherms of De-Al-Beta、Sn-Beta-2.5 and Sn-Beta-2.5-D

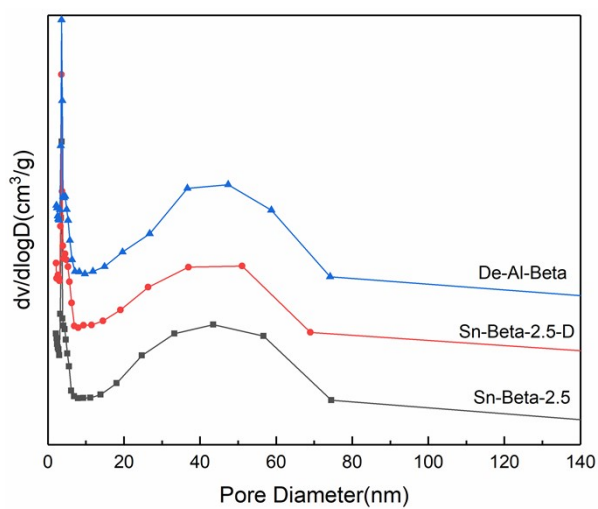

Fig. 5 Corresponding pore size distributions of De-Al-Beta、Sn-Beta-2.5 and Sn-Beta-2.5-D

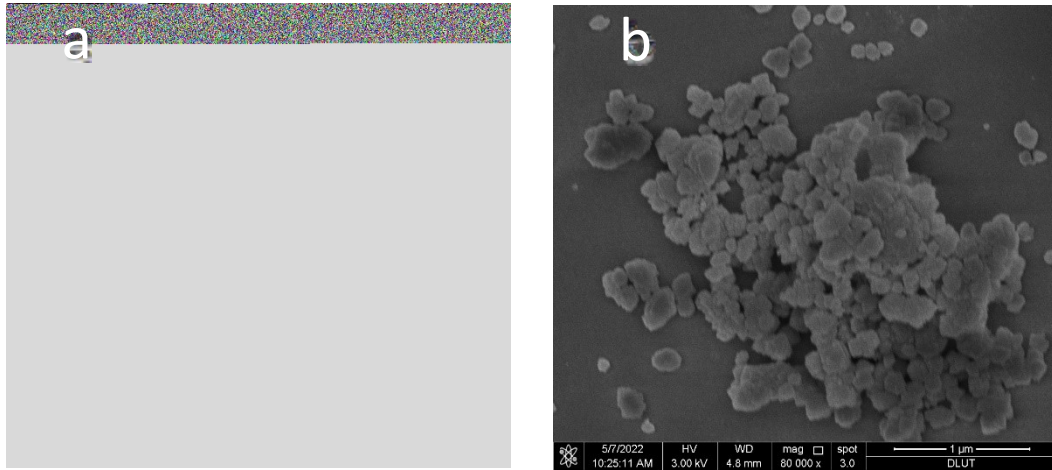

Fig. 6 SEM images of the Sn-Beta-2.5 (a), Sn-Beta-2.5-D (b)

Table 1

Textural properties of Sn-Beta-2.5 and Sn-Beta-2.5-D

| Sample        | $S_{BET}^{2)}$<br>$m^2/g$ | $S_{ext}^{3)}$<br>$m^2/g$ | $V_{Total}^{4)}$<br>$cm^3/g$ | $V_{micro}^{5)}$<br>$cm^3/g$ | $V_{meso}^{6)}$<br>$cm^3/g$ | $RC^{7)}$<br>% |
|---------------|---------------------------|---------------------------|------------------------------|------------------------------|-----------------------------|----------------|
| Sn-Beta-2.5-D | 663                       | 144                       | 0.46                         | 0.20                         | 0.26                        | 69             |
| Sn-Beta-2.5   | 638                       | 138                       | 0.46                         | 0.20                         | 0.26                        | 78             |

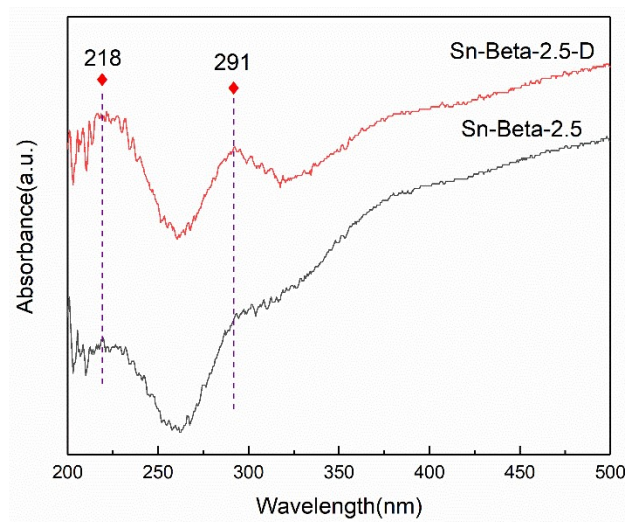

Fig. 7 UV-vis spectra of Sn-Beta-2.5 and Sn-Beta-2.5-D

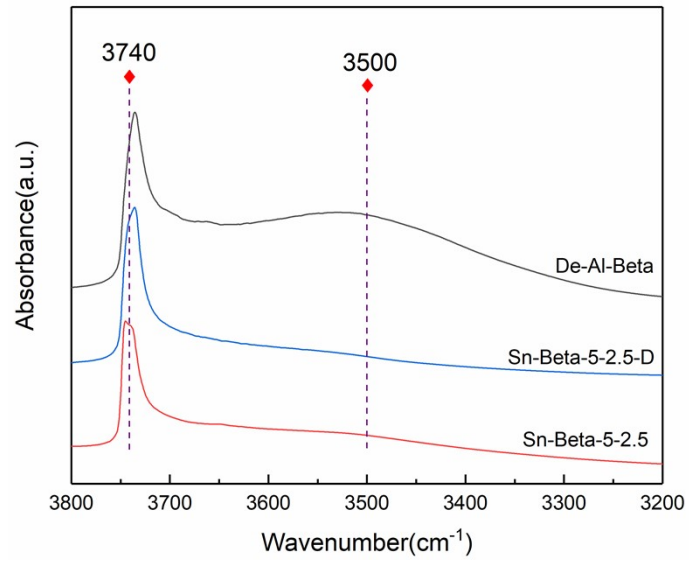

Fig.8 FT-IR spectra of the De-Al-Beta、Sn-Beta-2.5 and Sn-Beta-2.5-D

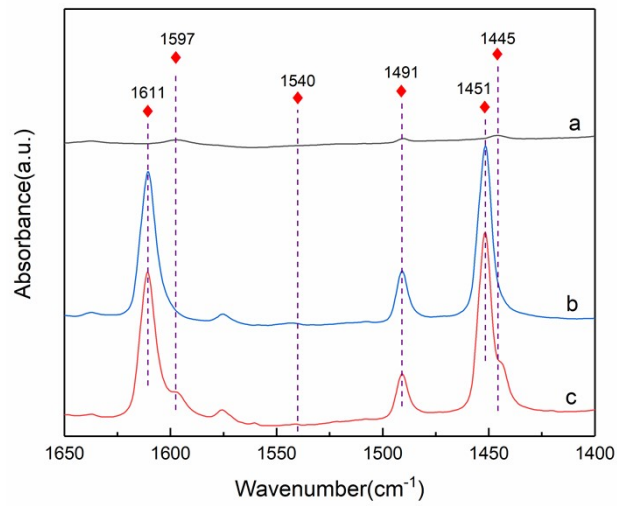

Fig. 9 FT-IR spectra of the De-Al-Beta、Sn-Beta-2.5 and Sn-Beta-2.5-D samples after pyridine adsorption at 298K for 30 min and desorption at 423K for 35 min

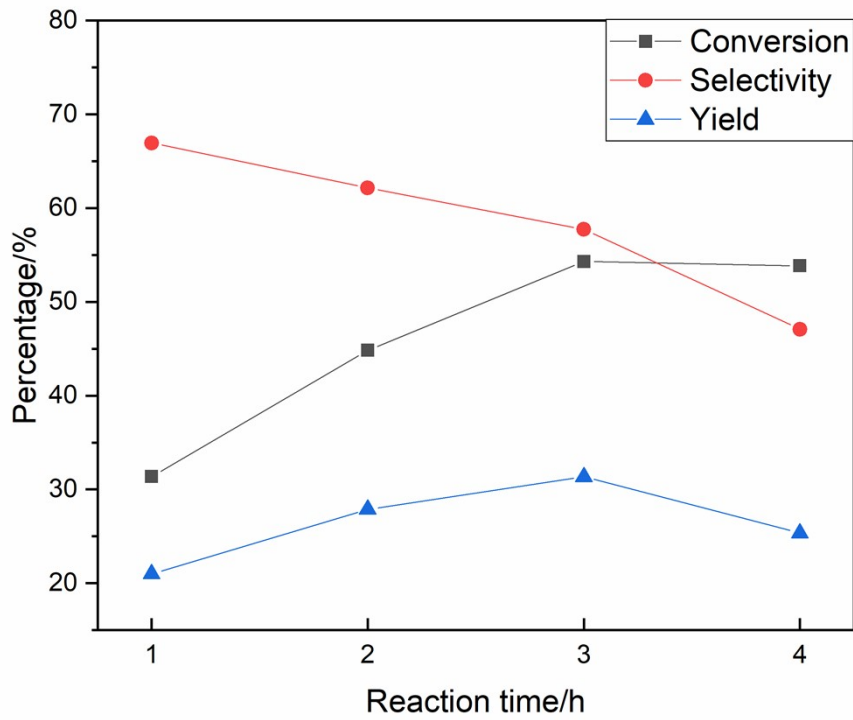

Fig. 10 Catalytic performances of the Sn-Beta-2.5 zeolite at different reaction times

Table 2

Table 5 Si/Sn molar ratios and Lewis acid contents of Sn-Beta-2.5-D and Sn-Beta-2.5

| Sample          | Si/Sn <sup>1)</sup> | LS <sup>2)</sup>  |
|-----------------|---------------------|-------------------|
|                 |                     | $\mu\text{mol/g}$ |
| Sn-Beta-5-2.5-D | 33                  | 144               |
| Sn-Beta-5-2.5   | 37                  | 171               |

注 <sup>1)</sup>Determined by ICP-OES; <sup>2)</sup>Calculating according to the equation given in the literature
